# Supplementary material
Source: publisher site journal article supplement (https://www.dovepress.com/article/330059)
Supplement: Supplementary file 1 [file get_supplementary_file.php]

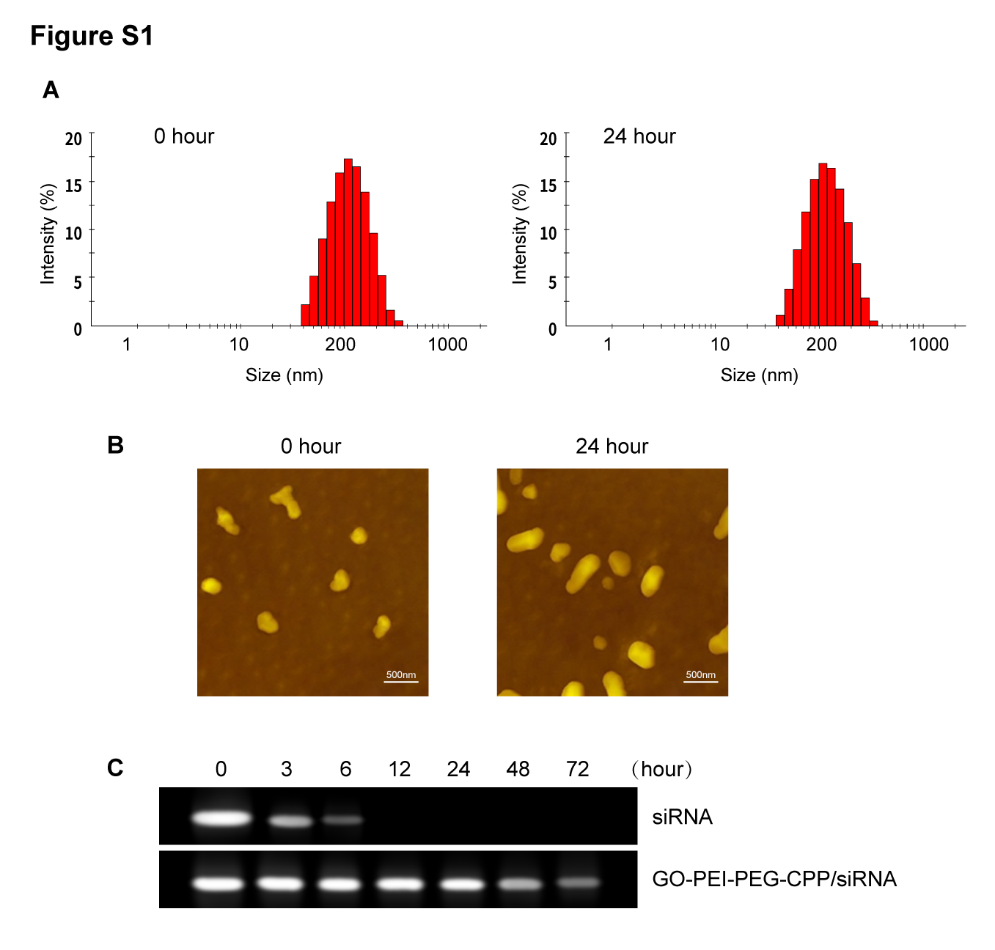


Fig. S1. Stability of GO-PEI-PEG-CPP/siRNA. (A) Particle size of GO-PEI-PEG-CPP/siRNA at 0 and 24 hour was detected by DLS. (B) Morphology of GO-PEI-PEG-CPP/siRNA over 24 hours was assessed by AFM. (C) Stability of the GO-PEI-PEG-CPP/siRNA in serum. The GO-PEI-PEG-CPP/siRNA and naked siRNA were suspended in 37℃ serum for 0, 3, 6, 2, 24, 48, 72 hours, respectively, then the quantification of siRNA was performed by using 2% agarose gel.


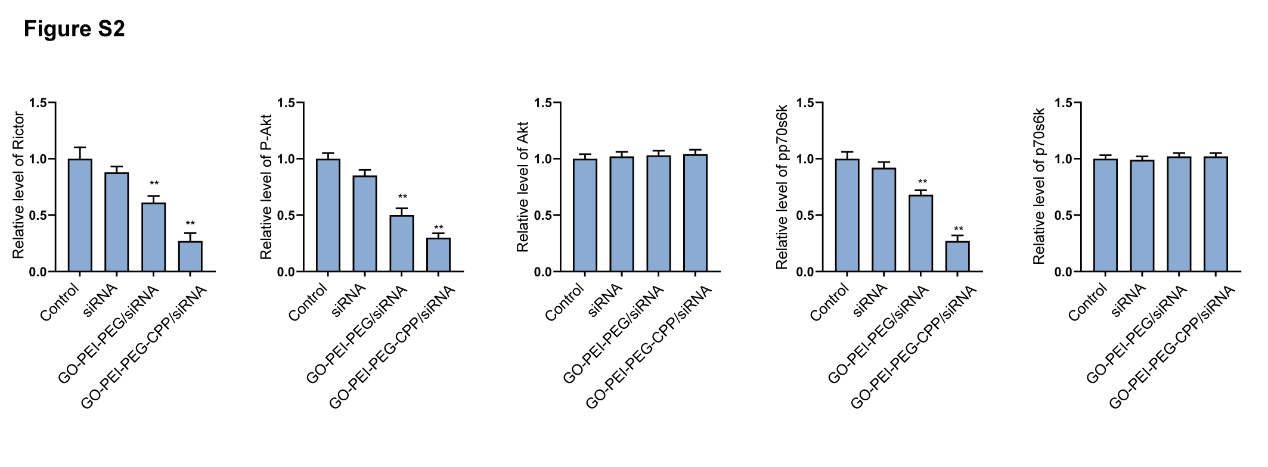


Fig. S2. Quantification of protein levels of Rictor, Akt, p70s6k, and the phosphorylation of Akt and p70s6k.
